# Supplementary material
Source: PubMed Central journal article supplement (PMC9992237)
Supplement: NIHMS1866114-supplement-2.pdf [file NIHMS1866114-supplement-2.pdf]

**Table S1**

| <b>DNA-PKcs mutations</b>                     |                          |                                                                         |
|-----------------------------------------------|--------------------------|-------------------------------------------------------------------------|
| 4XK/R>Ala; R1854A +K1857A+ K1913A+ K1917A     | <b>4xala</b>             | Disrupts interaction between DNA-PKcs and Ku80 C-terminus.              |
| 2569-2571; S2569A + D2570A                    | <b>2569</b>              | Disrupts interaction with DNA-PKcs 898-900                              |
| 898-900: F898A + R899A + E900A                | <b>898</b>               | Disrupts interaction with DNA-PKcs 2569-2571                            |
| 2569-2571+898-900                             | <b>898/2569</b>          |                                                                         |
| 4XK/R>Ala+898-900                             | <b>898/4xala</b>         |                                                                         |
| 4XK/R>Ala+2569-2571                           | <b>2569/4xala</b>        |                                                                         |
| 898-900: F898A + R899A + E900A + K902D +K944D | <b>898+902asp</b>        | More severely disrupts the 898-900 interface                            |
| 4XK/R>Asp; R1854D +K1857D+ K1913D+ K1917D     | <b>4xasp</b>             | More severely disrupts interaction between DNA-PKcs and Ku80 C-terminus |
| 898-900+902D+4XK/R>Asp                        | <b>898+902asp+ 4xasp</b> |                                                                         |
| <b>Ku80 mutations</b>                         |                          |                                                                         |
| Linker insert 1                               | <b>Ins1</b>              | Inserts 5 residues in linker                                            |
| Linker insert 2                               | <b>Ins2</b>              | Inserts 15 glycine at the C terminus of linker                          |
| 3 residue linker deletion                     | <b>Δ3</b>                | Deletes 3 residues in linker                                            |
| 6 residue linker deletion                     | <b>Δ6</b>                | Deletes 6 residues in linker                                            |
| 10 residue linker deletion                    | <b>Δ10</b>               | Deletes 10 residues in linker                                           |
| 13 residue linker deletion                    | <b>Δ13</b>               | Deletes 13 residues in linker                                           |
| 15 residue linker deletion                    | <b>Δ15</b>               | Deletes 15 residues in linker                                           |
| Linker/Ctd deletion                           | <b>ΔCTD</b>              | Deletes entire linker and C-terminal helix                              |
| <b>XLF mutations</b>                          |                          |                                                                         |
| Disruption of XRCC4/XLF interaction           | <b>L</b>                 | L115A                                                                   |
| Disruption of XLF KBM/Ku80 interaction        | <b>B</b>                 | L297W                                                                   |
| Disruption of XLF/Ku70 interaction            | <b>K</b>                 | RDR176-178AAA                                                           |
| L115A+L297W                                   | <b>L+B</b>               |                                                                         |
| L115A+RDR176-178AAA                           | <b>L+K</b>               |                                                                         |
| RDR176-178AAA+L297W                           | <b>K+B</b>               |                                                                         |
| L115A+RDR176-178AAA+L297W                     | <b>L+K+B</b>             |                                                                         |

**Supplemental Table 1. Related to Figures 1-7. DNA-PKcs, Ku80, and XLF mutants utilized in this study.**

Figure S1.

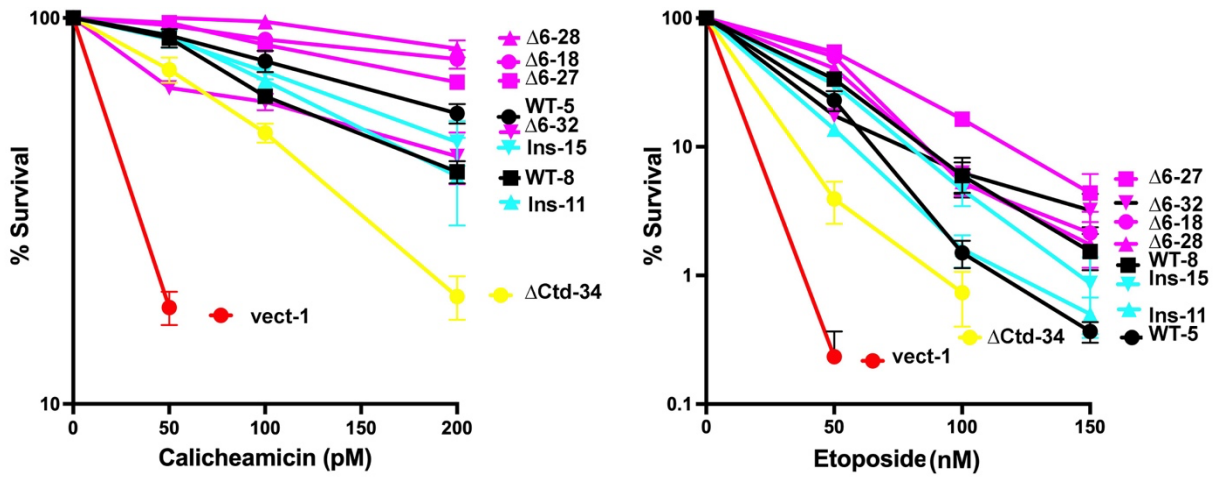

**Supplemental Figure 1. Related to Figure 1. Altering the length of the disordered linker in the C-terminus of Ku80 to favor cis or trans interactions alters end-joining.** *xrs6* clonal transfectants expressing wild-type human Ku80 (WT), the  $\Delta 6$  linker shortening mutant ( $\Delta 6$ ), the *ins1* linker lengthening mutant (Ins), or  $\Delta$ Ctd linker/C-terminal+helix deletion mutant ( $\Delta$ Ctd), or no Ku80 (vect) were plated at cloning densities into complete medium with increasing doses of calicheamicin or etoposide. Colonies were stained after eight days, and percent survival was calculated. Error bars represent the standard error of the mean.

Figure S2.

**A**

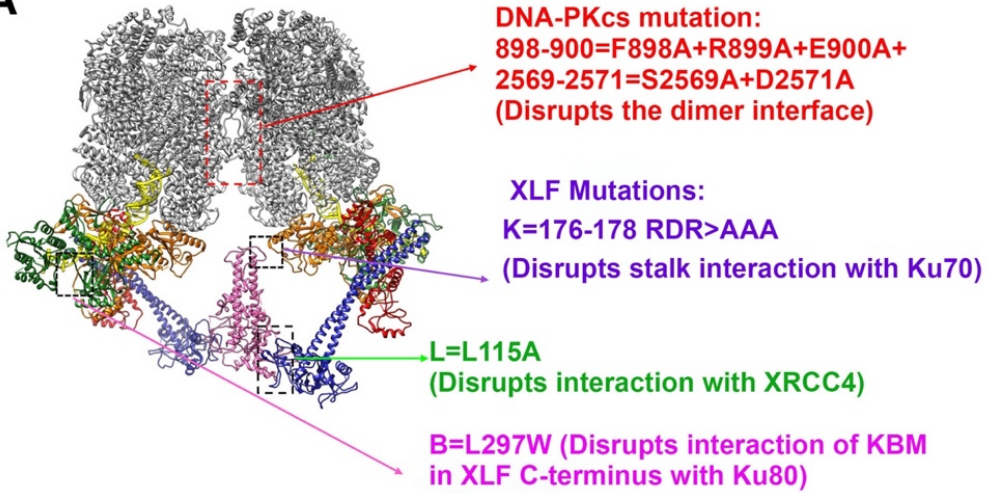

**B**

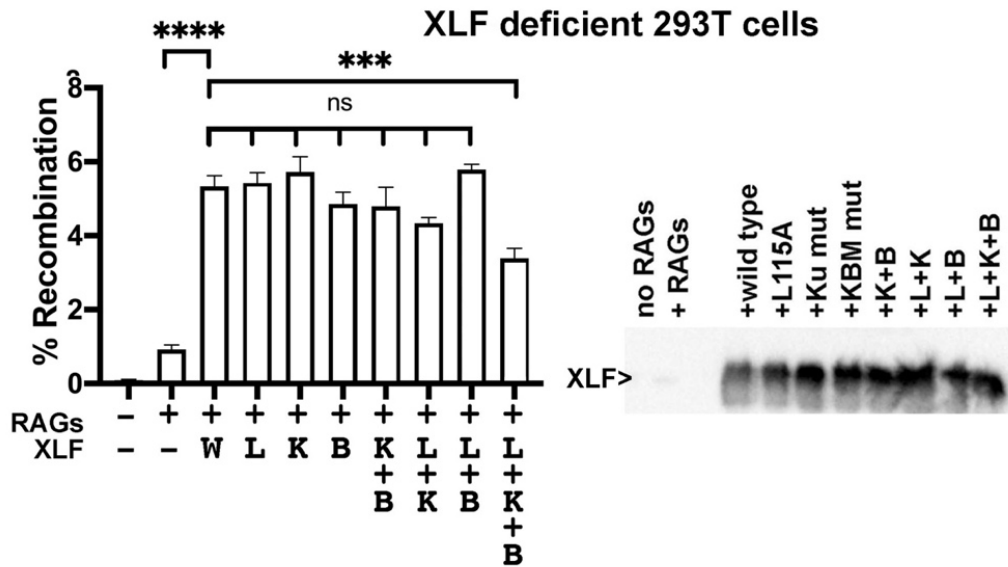

**C**

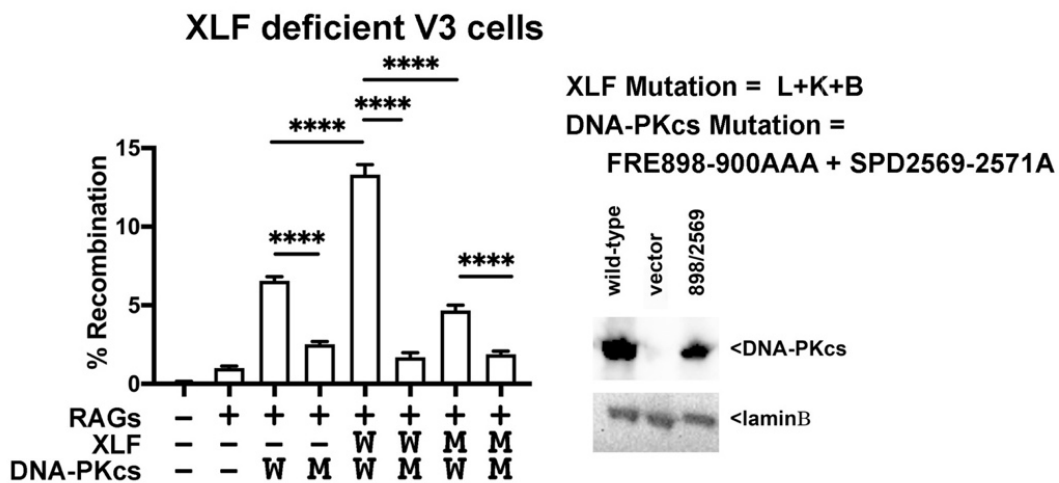

**Supplemental Figure 2. Related to Figure 2. Via multiple protein-protein interactions, a single XLF dimer interacts with Ku70, Ku80, and XRCC4 to promote a long-range synaptic complex.** (A) Ribbon diagram of the XLF-mediated long-range complex as reported by Chaplin *et al.* (Chaplin *et al.*, 2021b) (PDB:7NFC). DNA-PKcs is shown in grey, Ku80 in green, Ku70 in orange, XLF in pink, XRCC4 in purple, and DNA in yellow. (B) The fluorescent substrate 290-Crimson/ZS was utilized to detect coding end joining of RAG-induced DSBs in 293T cells lacking XLF as described previously (Roy *et al.*, 2015) (left). Immunoblot of transiently expressed XLF mutants in XLF<sup>-/-</sup> 293T cells (right). Percent recombination of episomal fluorescent coding-end joining substrate in cells transiently transfected with wild-type or mutant XLF expression constructs as described in 3A. Error bars indicate SEM from five independent experiments. \*\*\*\*P<0.0001, \*\*\*P<0.001; in two-way ANOVA with Holm-Sidak correction. (C) Fluorescent substrate 290-Crimson/ZS was utilized to detect coding end joining in XLF deficient V3 cells that lack both DNA-PKcs and XLF. Percent recombination assessed as in B. Error bars indicate SEM from three independent experiments. P values as in B.
